# Supplementary material for: Molecular Dynamics Exploration of Selectivity of Dual Inhibitors 5M7, 65X, and 65Z toward Fatty Acid Binding Proteins 4 and 5
Source: PubMed Central journal article supplement (PMC6164837; doi:10.3390/ijms19092496), 2018-08-23
Supplement: ijms-19-02496-s001.pdf [file ijms-19-02496-s001.pdf]

## Supporting information for

# Molecular Dynamics Exploration of Selectivity of Dual Inhibitors 5M7, 65X and 65Z toward Fatty Acid Binding Proteins 4 and 5

Fangfang Yan<sup>1</sup>, Xinguo Liu<sup>1,\*</sup>, Shaolong Zhang<sup>1</sup>, Jing Su<sup>1</sup>, Qinggang Zhang<sup>1</sup> and Jianzhong Chen<sup>2,\*</sup>

<sup>1</sup> School of Physics and Electronics, Shandong Normal University, Jinan, 250358, China;

<sup>2</sup> School of Science, Shandong Jiaotong University, Jinan, 250357, China

\* Corresponding: liuxinguo@sdu.edu.cn (X. Liu); chenjianzhong1970@163.com and jzchen@sdjtu.edu.cn (J. Chen)

Table S1. Comparison of energy contribution of individual component in inhibitor-FABP4 and inhibitor-FABP5 systems by MM-GBSA method<sup>a</sup>

| Energy      | $\Delta\Delta E_{\text{ele}}$ | $\Delta\Delta E_{\text{vdw}}$ | $\Delta\Delta G_{\text{pol}}$ | $\Delta\Delta G_{\text{nopol}}$ | <sup>b</sup> $\Delta\Delta G_{\text{ele+pol}}$ |
|-------------|-------------------------------|-------------------------------|-------------------------------|---------------------------------|------------------------------------------------|
| 5M7-FABP4/5 | -7.30                         | 3.06                          | 1.19                          | 0.03                            | -6.12                                          |
|             | -6.84                         | 3.02                          | 1.46                          | 0.04                            | -5.27                                          |
|             | -7.35                         | 3.45                          | 1.22                          | 0.01                            | -6.03                                          |
|             | -7.63                         | 3.08                          | 1.54                          | 0.04                            | -6.09                                          |
|             | -7.66                         | 3.14                          | 1.97                          | 0.07                            | -5.69                                          |
| AVE         | -7.36                         | 3.15                          | 1.48                          | 0.04                            | -5.84                                          |
| SD          | 0.30                          | 0.15                          | 0.28                          | 0.02                            | 0.32                                           |
| 65X-FABP4/5 | -14.26                        | 1.95                          | 8.66                          | 0.04                            | -5.60                                          |
|             | -14.01                        | 1.64                          | 8.80                          | 0.04                            | -5.21                                          |
|             | -13.10                        | 1.85                          | 7.02                          | 0.03                            | -6.08                                          |
|             | -14.24                        | 1.45                          | 8.22                          | 0.07                            | -6.02                                          |
|             | -14.08                        | 1.35                          | 8.30                          | 0.06                            | -5.77                                          |
| AVE         | -13.94                        | 1.68                          | 8.2                           | 0.05                            | -5.74                                          |
| SD          | 0.43                          | 0.23                          | 0.63                          | 0.01                            | 0.31                                           |
| 65Z-FABP4/5 | -13.33                        | 1.68                          | 8.65                          | 0.29                            | -4.68                                          |
|             | -14.12                        | 1.44                          | 9.47                          | 0.33                            | -4.65                                          |
|             | -14.61                        | 1.52                          | 9.10                          | 0.31                            | -5.51                                          |
|             | -12.84                        | 2.05                          | 8.45                          | 0.32                            | -4.39                                          |
|             | -14.21                        | 1.70                          | 9.51                          | 0.31                            | -4.70                                          |
| AVE         | -13.82                        | 1.68                          | 9.04                          | 0.31                            | -4.79                                          |
| SD          | 0.64                          | 0.21                          | 0.43                          | 0.01                            | 0.38                                           |

<sup>a</sup>All values are in kcal/mol.

$$\Delta\Delta E = \Delta E^{\text{FABP4}} - \Delta E^{\text{FABP5}}$$

$$\text{SD} = \sqrt{\frac{1}{5} \sum_{i=1}^5 (\Delta\Delta E^i - \Delta\Delta E^{\text{ave}})^2}$$

Table S2. Energy contribution of substituted residues in FABP4 and FABP5 calculated by MM-GBSA method<sup>a</sup>.

|               | 5M7-FABP4/5 |       | <sup>b</sup> $\Delta\Delta E$ | 65X-FABP4/5 |       | <sup>b</sup> $\Delta\Delta E$ | 65Z-FABP4/5 |       | <sup>b</sup> $\Delta\Delta E$ |
|---------------|-------------|-------|-------------------------------|-------------|-------|-------------------------------|-------------|-------|-------------------------------|
| Ser12/Asp15   | 0.02        | 0.16  | -0.14                         | 0.02        | 0.18  | -0.16                         | 0.02        | 0.17  | -0.15                         |
| Glu14/Lys17   | 0.18        | 0.17  | 0.01                          | -0.18       | -0.09 | -0.09                         | 0.18        | 0.09  | 0.09                          |
| Asp18/Glu21   | 0.11        | 0.11  | 0                             | 0.12        | 0.12  | 0                             | 0.11        | 0.12  | -0.01                         |
| Val23/Leu26   | -0.34       | -0.3  | -0.04                         | -0.51       | -0.38 | -0.13                         | -0.52       | -0.35 | -0.17                         |
| Phe27/Ile30   | -0.01       | -0.01 | 0                             | -0.01       | -0.01 | 0                             | -0.01       | -0.01 | 0                             |
| Thr29/Leu32   | -0.43       | -0.47 | 0.04                          | -0.32       | -0.43 | 0.11                          | -0.34       | -0.45 | 0.11                          |
| Val32/Met35   | -0.23       | -0.41 | 0.18                          | -0.16       | -0.27 | 0.11                          | -0.29       | -0.22 | -0.07                         |
| Ala33/Gly36   | -1.01       | 0.79  | -0.22                         | -1.43       | -0.47 | -0.96                         | -1.27       | -0.44 | -0.82                         |
| Gly34/Ala37   | 0.01        | -0.05 | 0.06                          | -0.02       | -0.04 | 0.02                          | 0           | -0.03 | 0.03                          |
| Asn39/Asp42   | -0.01       | 0.17  | -0.18                         | -0.05       | -0.22 | 0.17                          | -0.01       | -0.2  | 0.19                          |
| Met40/Cys43   | -0.13       | -0.09 | -0.04                         | -0.1        | -0.07 | -0.03                         | -0.1        | -0.07 | -0.03                         |
| Ser53/Thr56   | -0.61       | -0.78 | 0.17                          | -0.71       | -0.89 | 0.18                          | -0.49       | -0.63 | 0.14                          |
| Phe57/Leu60   | -1.12       | -0.77 | -0.35                         | -1.38       | -0.99 | -0.39                         | -1.08       | -0.67 | -0.41                         |
| Asn59/Thr62   | -0.1        | -0.16 | 0.06                          | 0.01        | 0.01  | 0                             | -0.03       | 0     | -0.03                         |
| Glu61/Gln64   | 0.16        | 0.02  | 0.14                          | 0.15        | 0.02  | 0.13                          | 0.15        | 0.02  | 0.13                          |
| Ile62/Phe65   | -0.02       | 0.02  | -0.04                         | -0.03       | -0.01 | -0.02                         | -0.01       | 0.01  | -0.02                         |
| Val73/Thr76   | -0.04       | -0.02 | -0.02                         | -0.01       | -0.01 | 0                             | -0.04       | -0.02 | -0.02                         |
| Asp77/Gly80   | 0.23        | 0.4   | -0.17                         | 0.28        | 0.11  | 0.17                          | -0.21       | -0.02 | -0.19                         |
| Ser101/Glu104 | -0.01       | 0.1   | -0.11                         | 0.01        | 0.11  | -0.1                          | -0.01       | 0.11  | -0.12                         |
| Lys120/Asn123 | -0.08       | 0.01  | -0.09                         | -0.07       | -0.01 | -0.06                         | -0.08       | 0.01  | -0.09                         |
| Ser124/Cys127 | -0.03       | -0.22 | 0.19                          | -0.04       | -0.15 | 0.11                          | 0.02        | -0.08 | 0.1                           |
| Val127/Ile130 | -0.02       | -0.02 | 0                             | -0.02       | -0.02 | 0                             | -0.02       | -0.02 | 0                             |

<sup>a</sup>All values are in kcal/mol.

$$\supset \Delta\Delta E = \Delta E^{\text{FABP4}} - \Delta E^{\text{FABP5}}$$

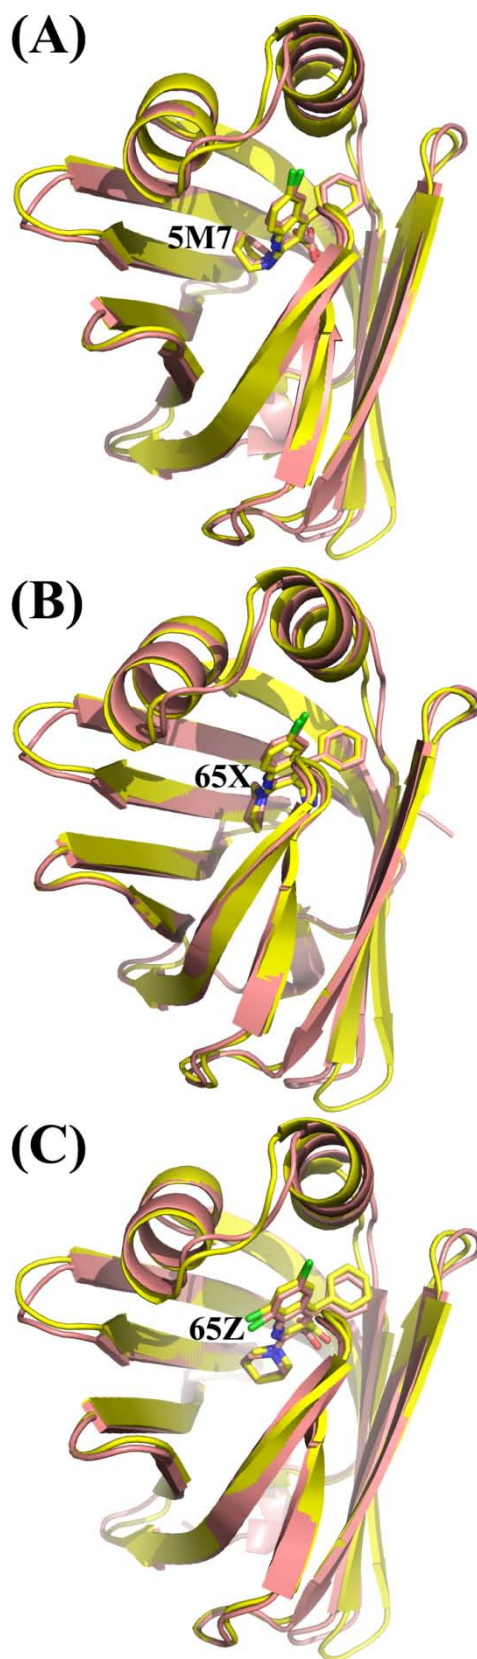

**Figure S1.** Superposition of conformations used in the experimental studies between inhibitor-FABP4 (yellow) and inhibitor-FABP5 (pink) complexes. **(A)** 5M7-FABP4/FABP5, **(B)** 65X-FABP4/FABP5 and **(C)** 65Z-FABP4/FABP5.

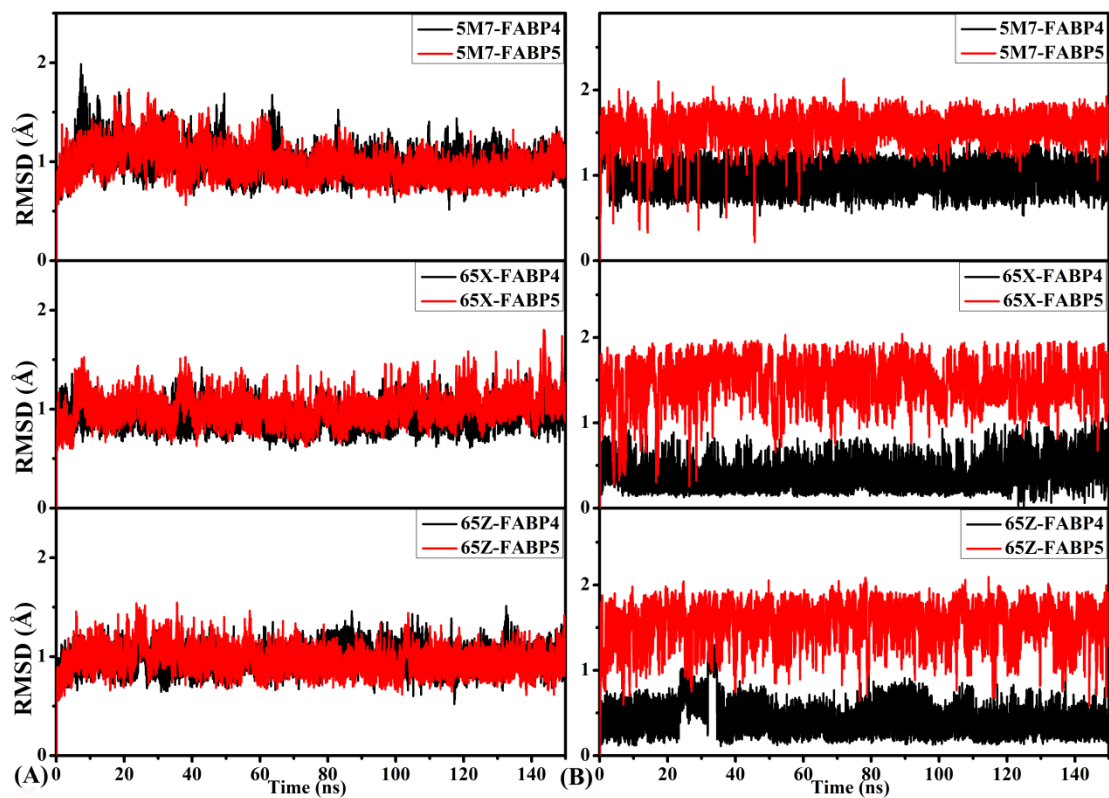

**Figure S2.** Root-mean-square-deviations (RMSDs) of the backbone atoms in FABP4/FABP5 (A) and three inhibitors (B) relative to their starting structures during the MD simulation as function as time.

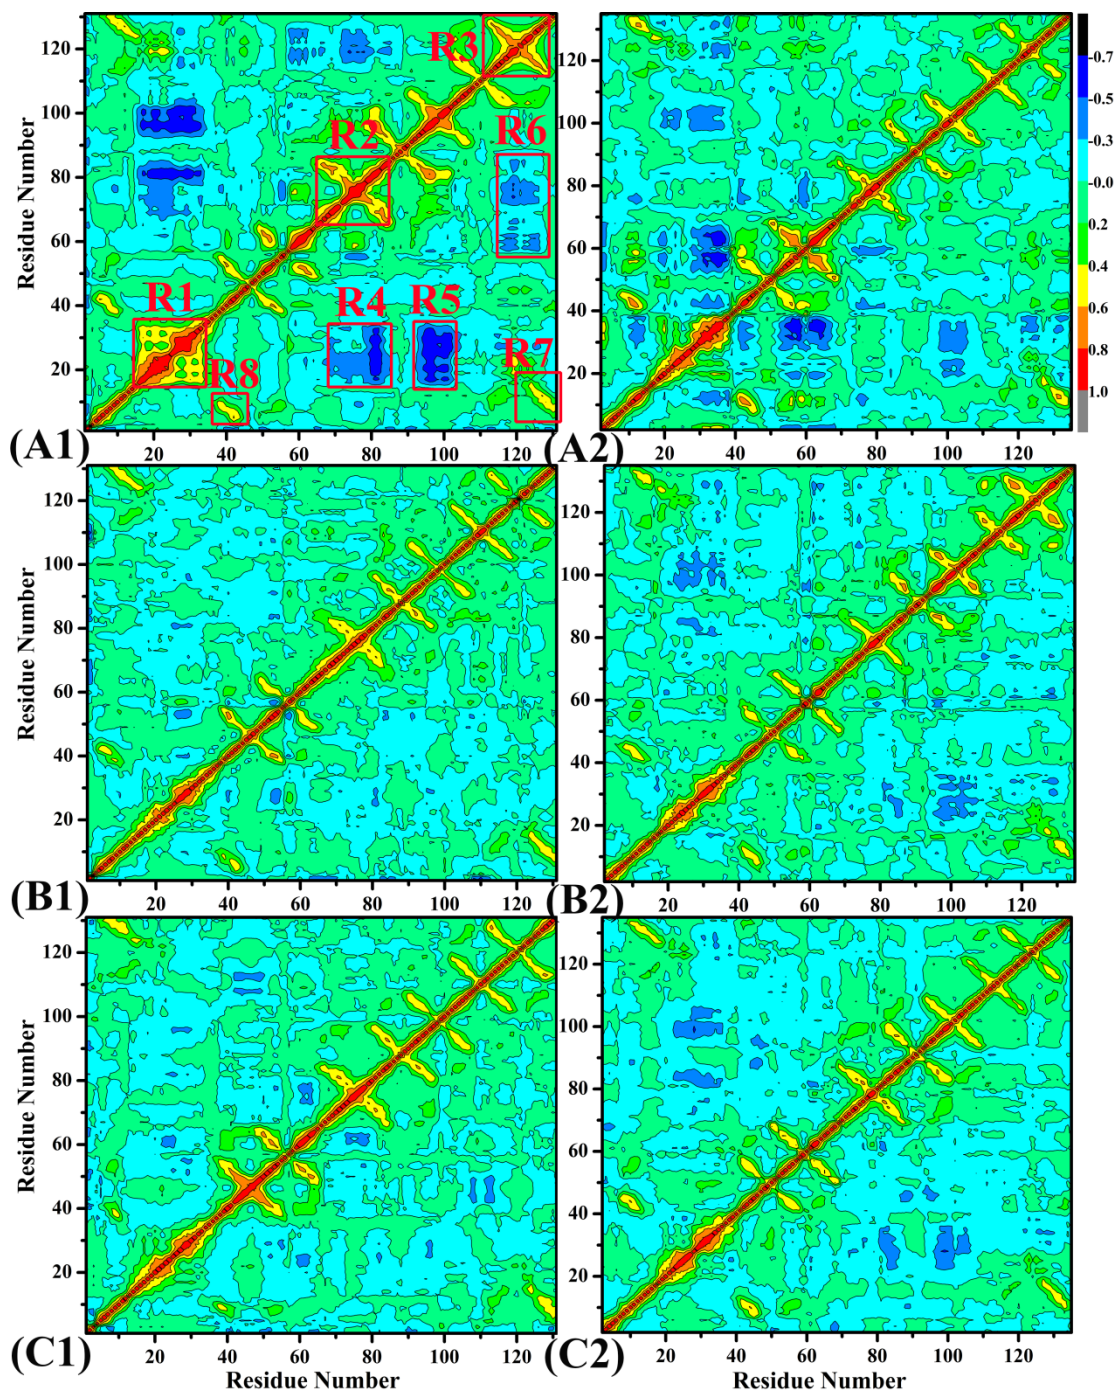

Figure S3. Cross-correlation matrices of fluctuations of C $\alpha$  atoms relative to their average positions in six systems: (A1/A2) 5M7-FABP4/FABP5, (B1/B2) 65X-FABP4/FABP5 and (C1/C2) 65Z-FABP4/FABP5.

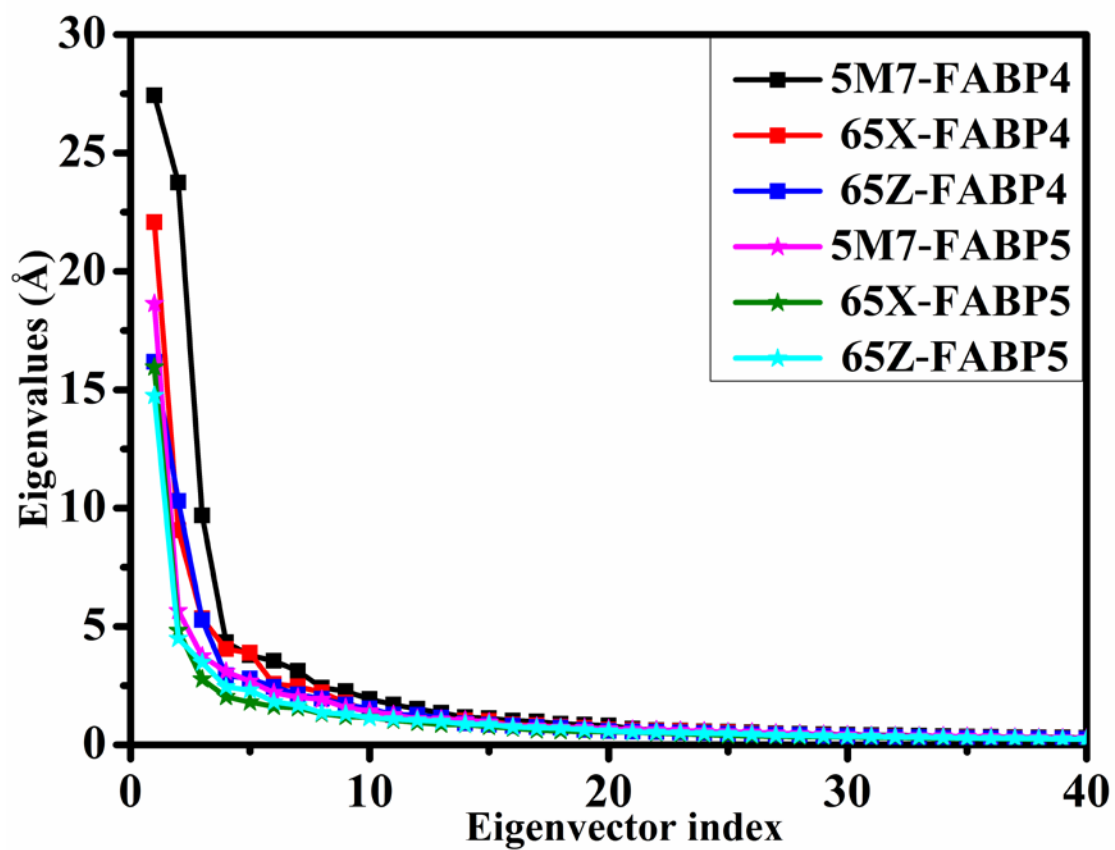

Figure S4. Comparison of the eigenvalues plotted against the corresponding eigenvector indices originated from the diagonalization of covariance matrix of C $\alpha$  atoms.
